# Supplementary material for: FTO suppresses cardiac fibrosis after myocardial infarction via m6A-mediated epigenetic modification of EPRS
Source: PubMed Central journal article supplement (PMC11562098; doi:10.1186/s10020-024-00985-7), 2024-11-13
Supplement: 10020_2024_985_MOESM2_ESM.pdf [file 10020_2024_985_MOESM2_ESM.pdf]

Figure 1 a

m<sup>6</sup>A dot blot

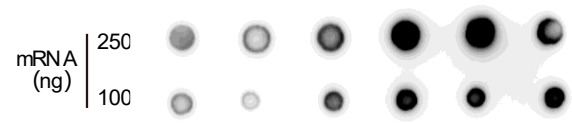

Methylene blue

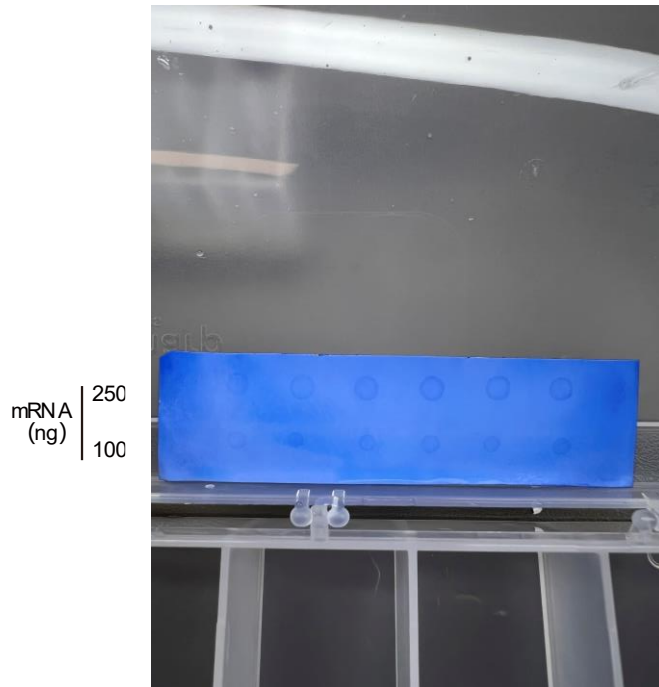

Figure 1 b

m<sup>6</sup>A dot blot

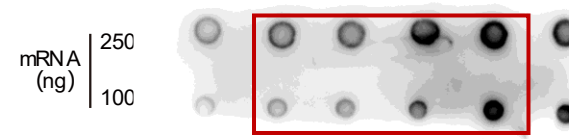

Methylene blue

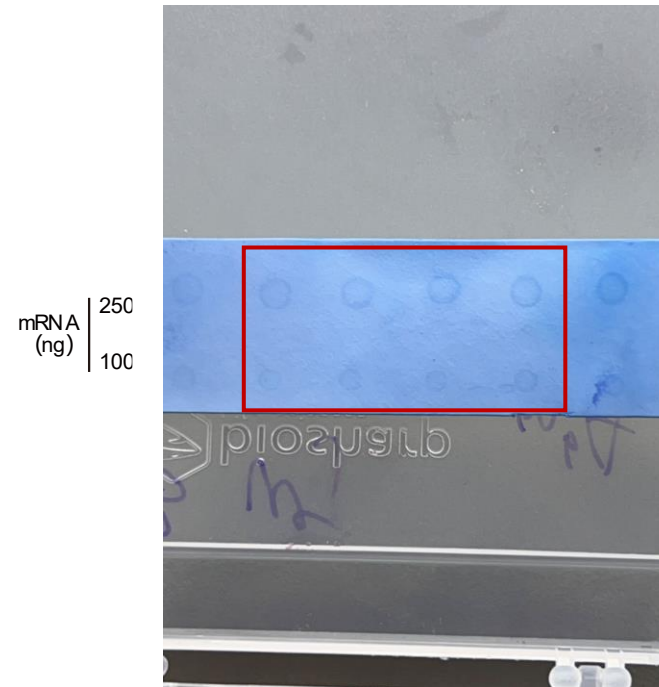

Figure 1 h

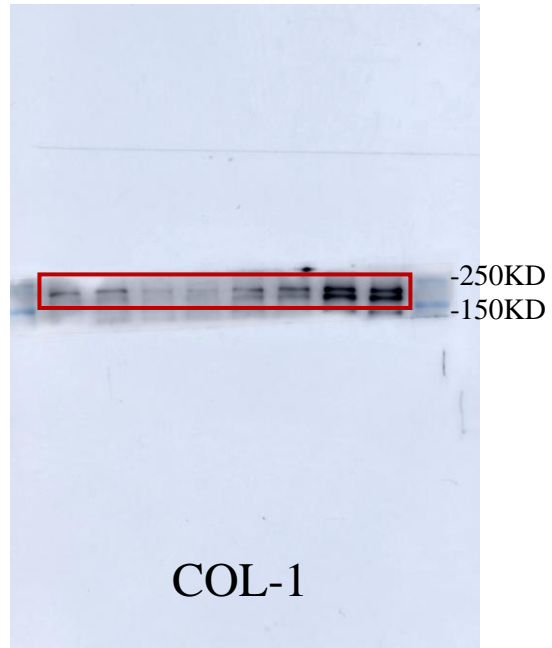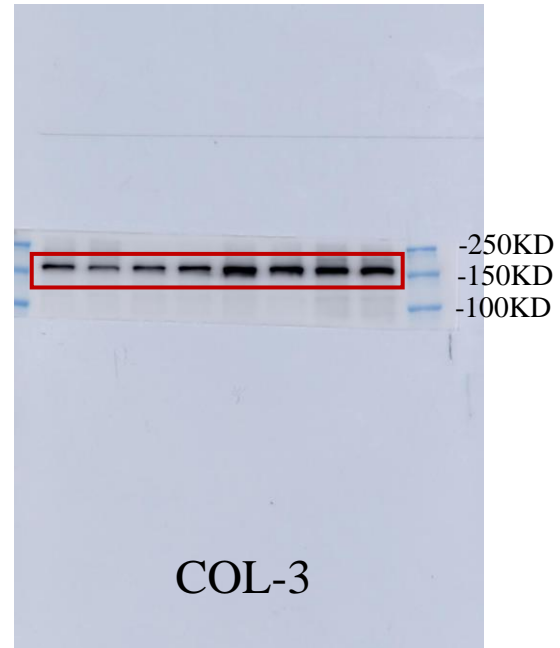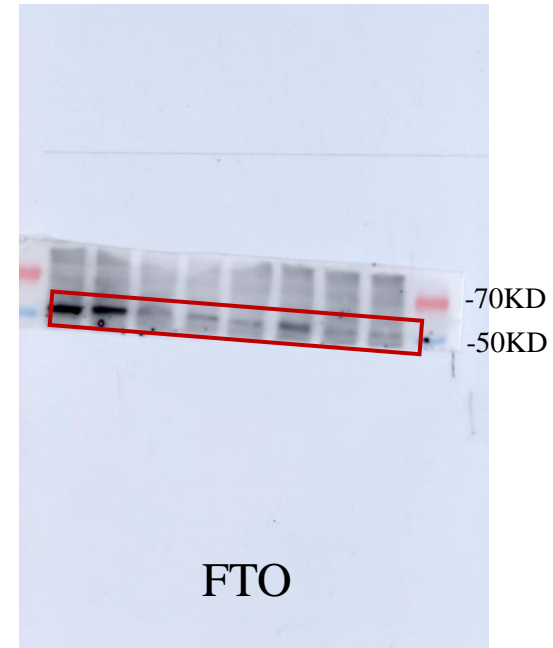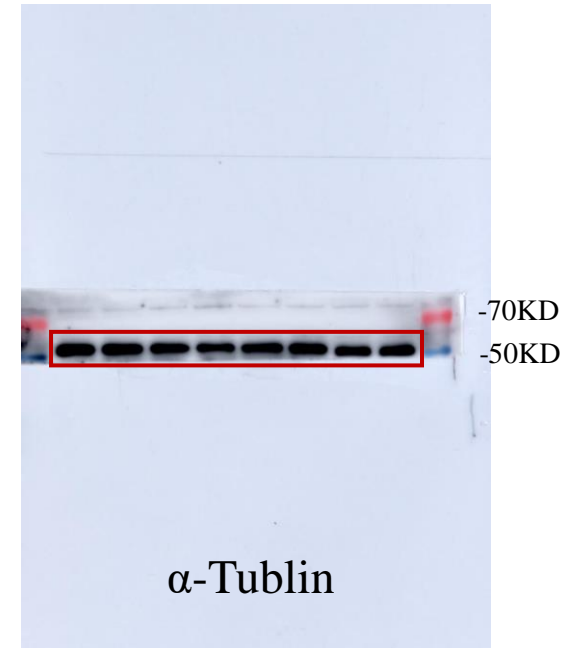

Figure 1 j

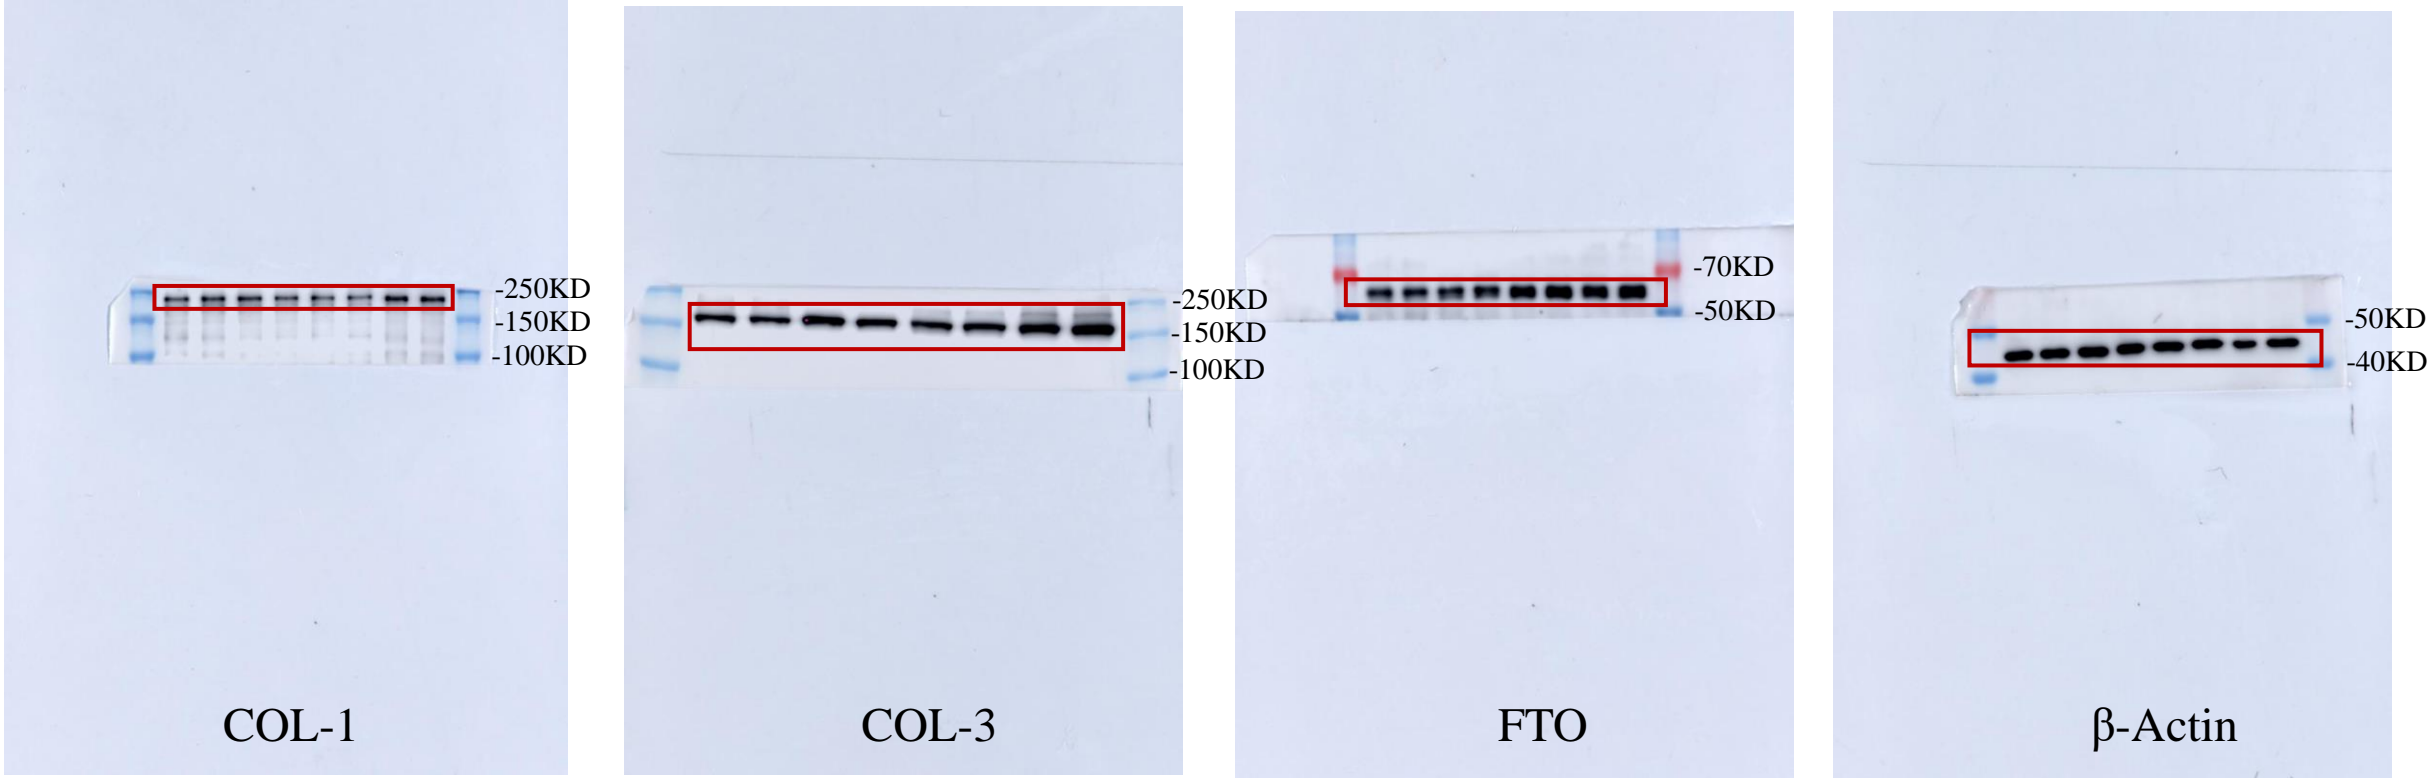

Figure 2 a

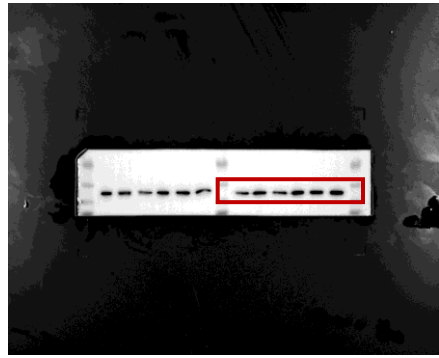

$\beta$ -Actin

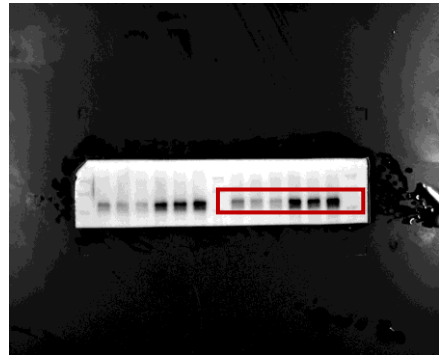

HIF1 $\alpha$

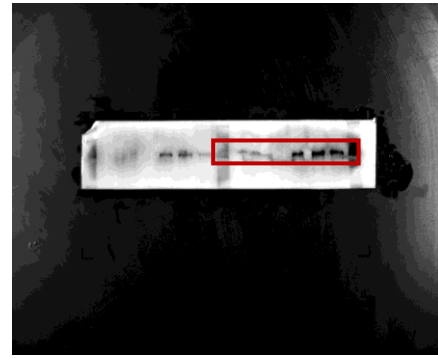

HIF2 $\alpha$

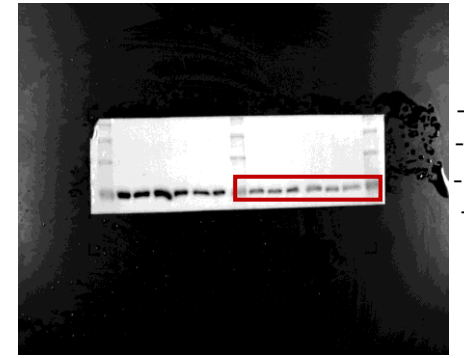

FTO

Figure 2 c

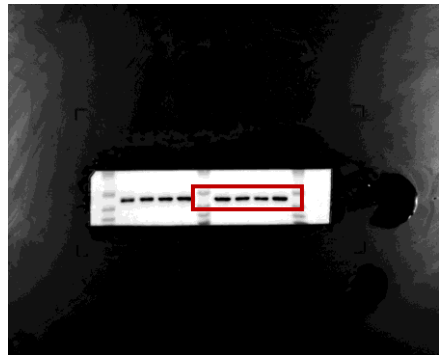

$\beta$ -Actin

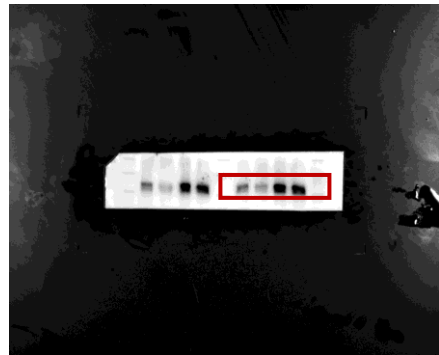

HIF1 $\alpha$

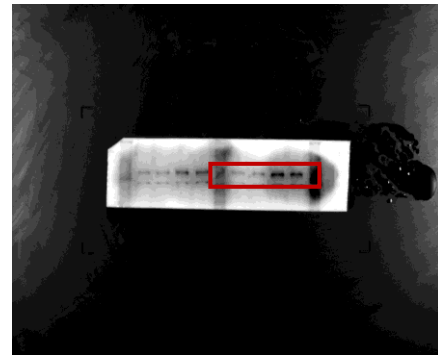

HIF2 $\alpha$

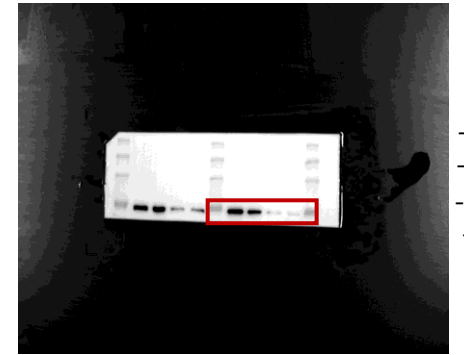

FTO

Figure 2 g Si-HIF1 $\alpha$

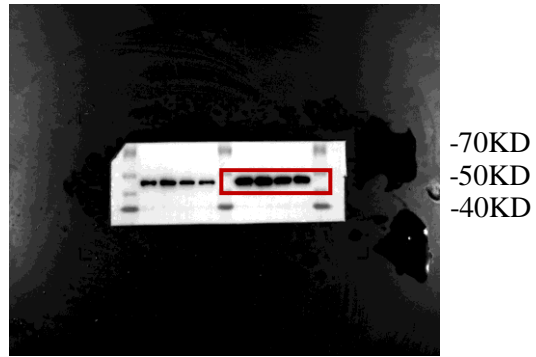

$\beta$ -Actin

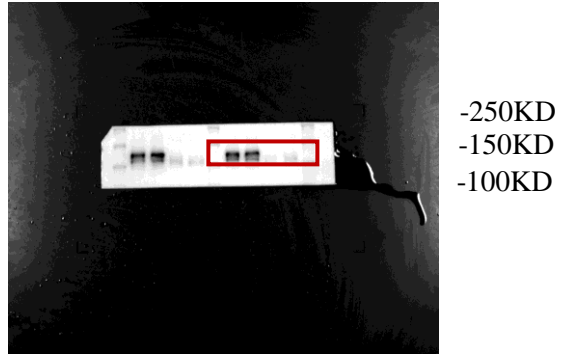

HIF1 $\alpha$

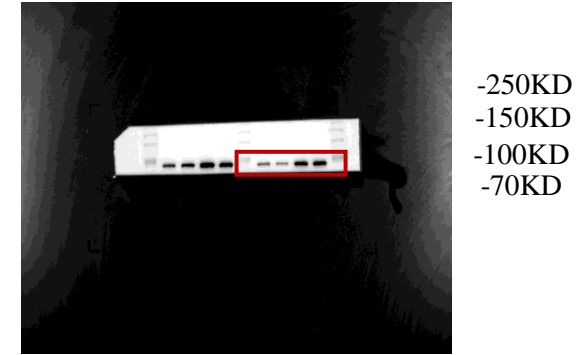

FTO

Figure 2 g Si-HIF2 $\alpha$

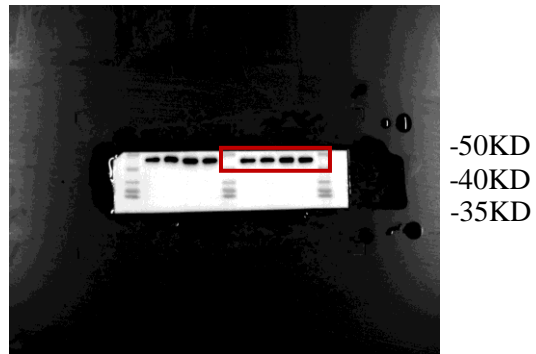

$\beta$ -Actin

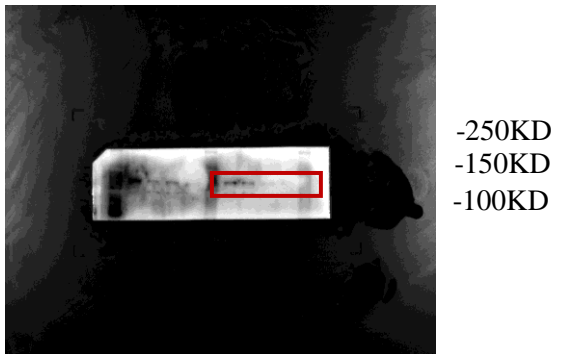

HIF2 $\alpha$

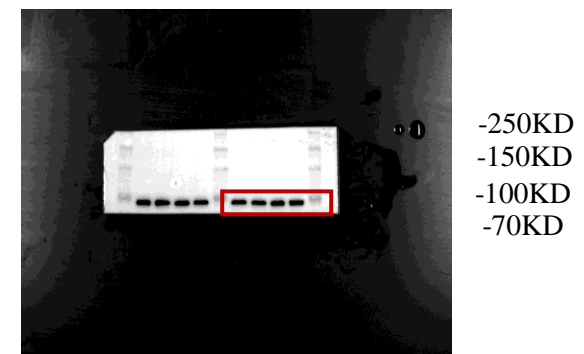

FTO

Figure 3 b

m<sup>6</sup>A dot blot

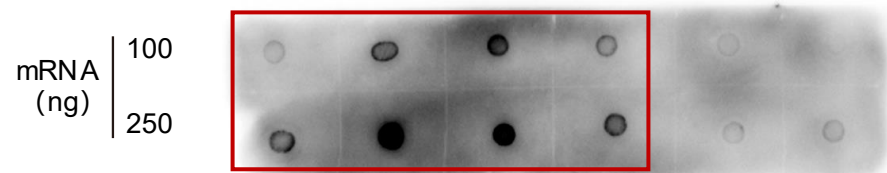

Methylene blue

mRNA (ng) | 100  
| 250

The dot blot shows two rows of spots. The top row is labeled '100' and the bottom row is labeled '250'. A red box highlights the first four spots in both rows. The spots in the 250 ng row are significantly darker than those in the 100 ng row, indicating a higher level of total RNA.

Figure 3 c

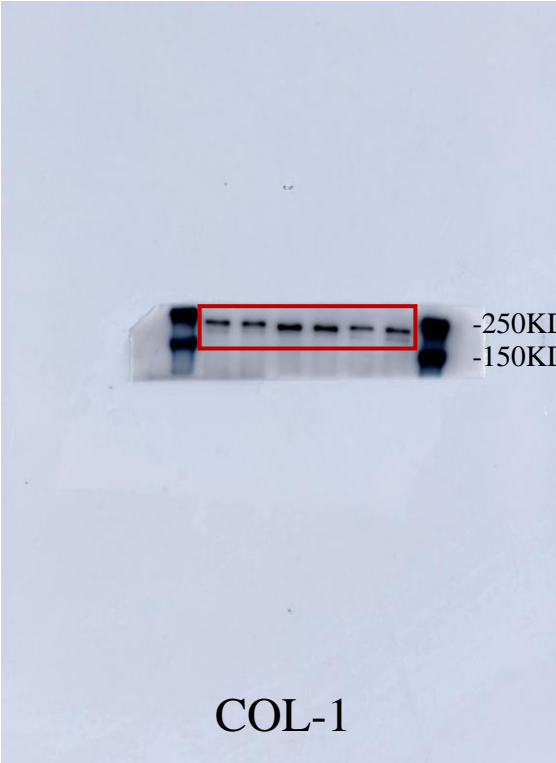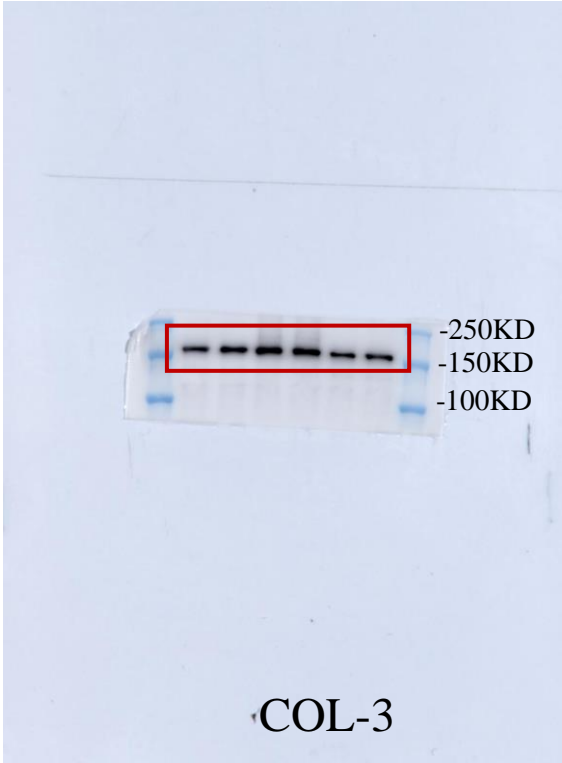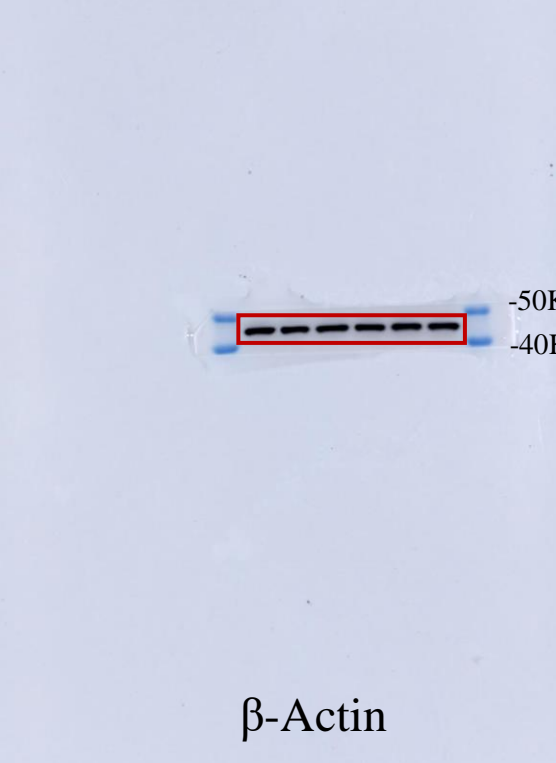

Figure 3 e

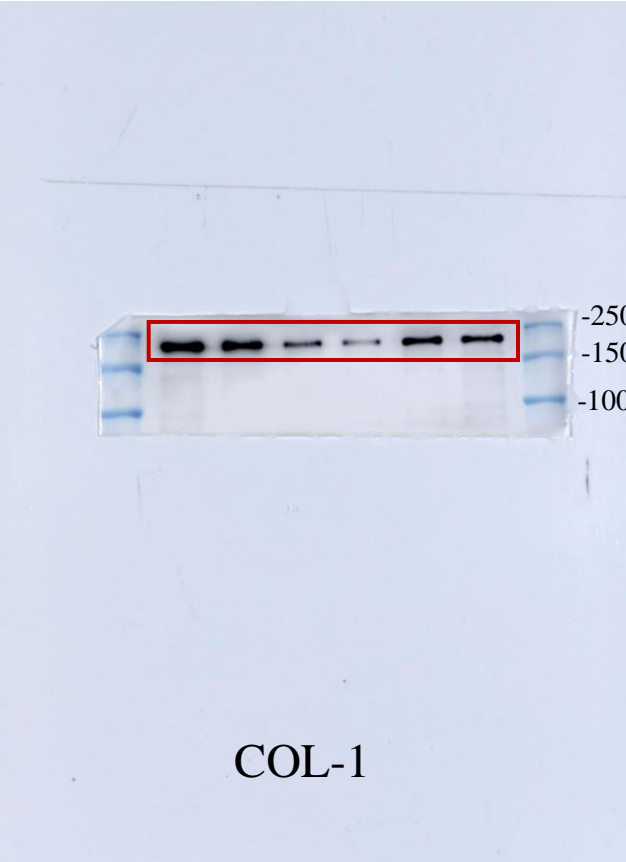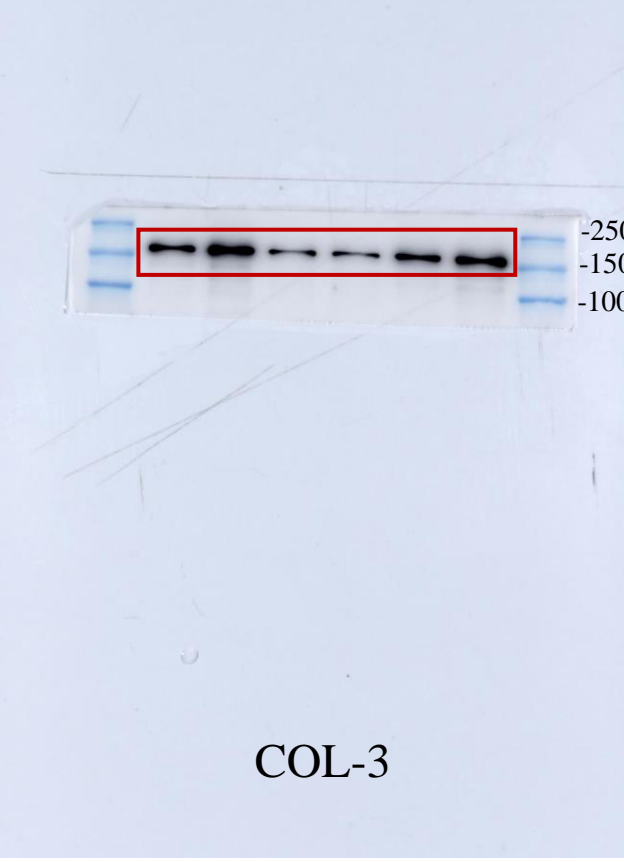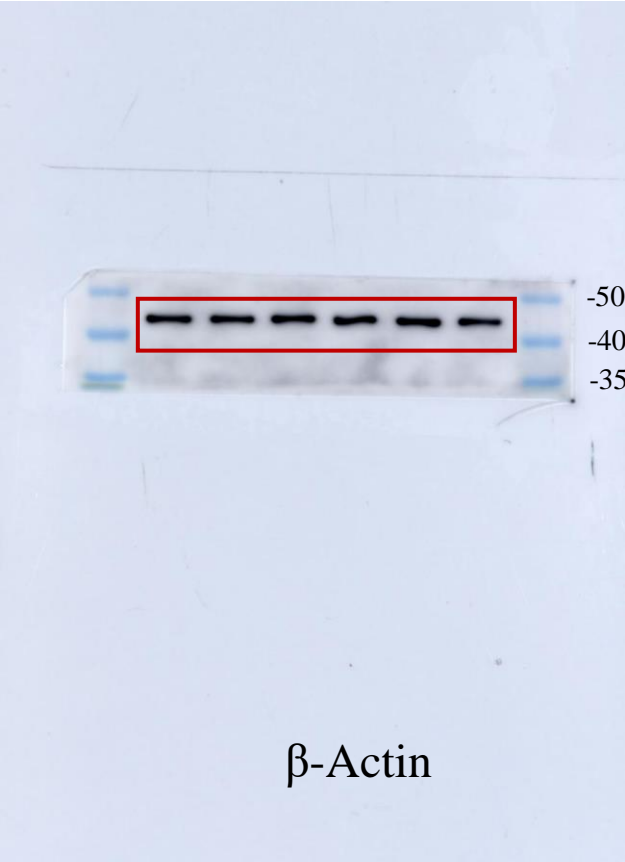



Figure 4 a

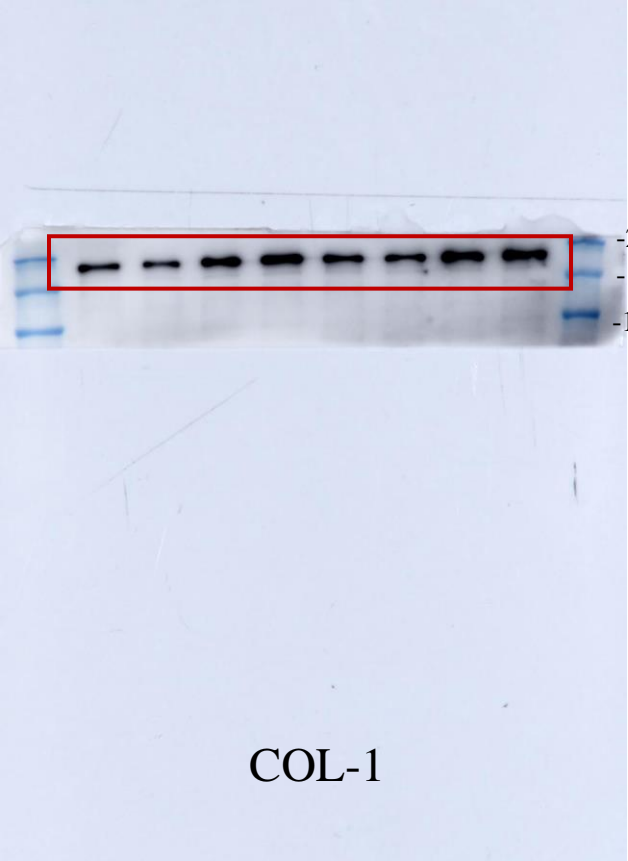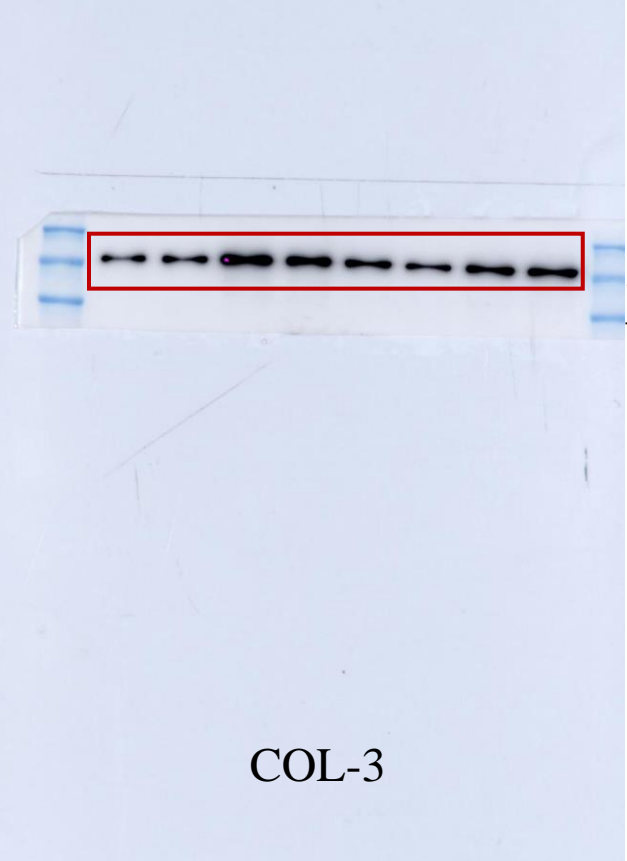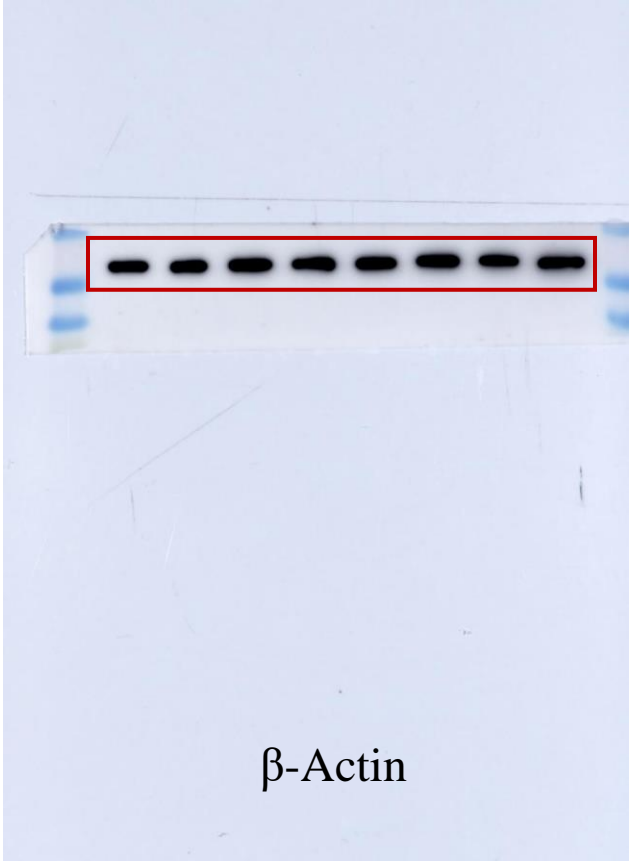

Figure 4 g

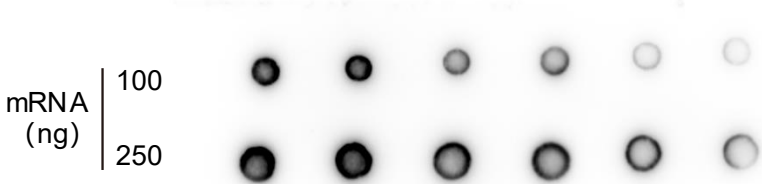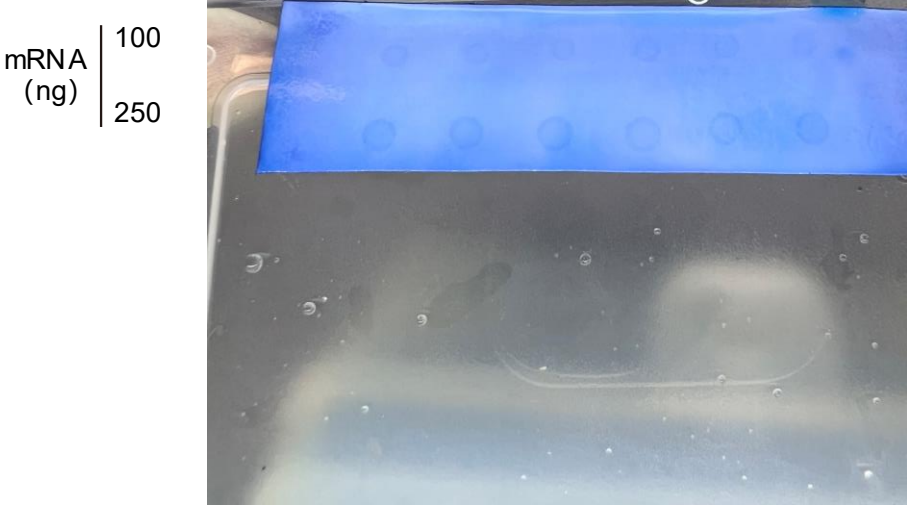

Figure 4 j

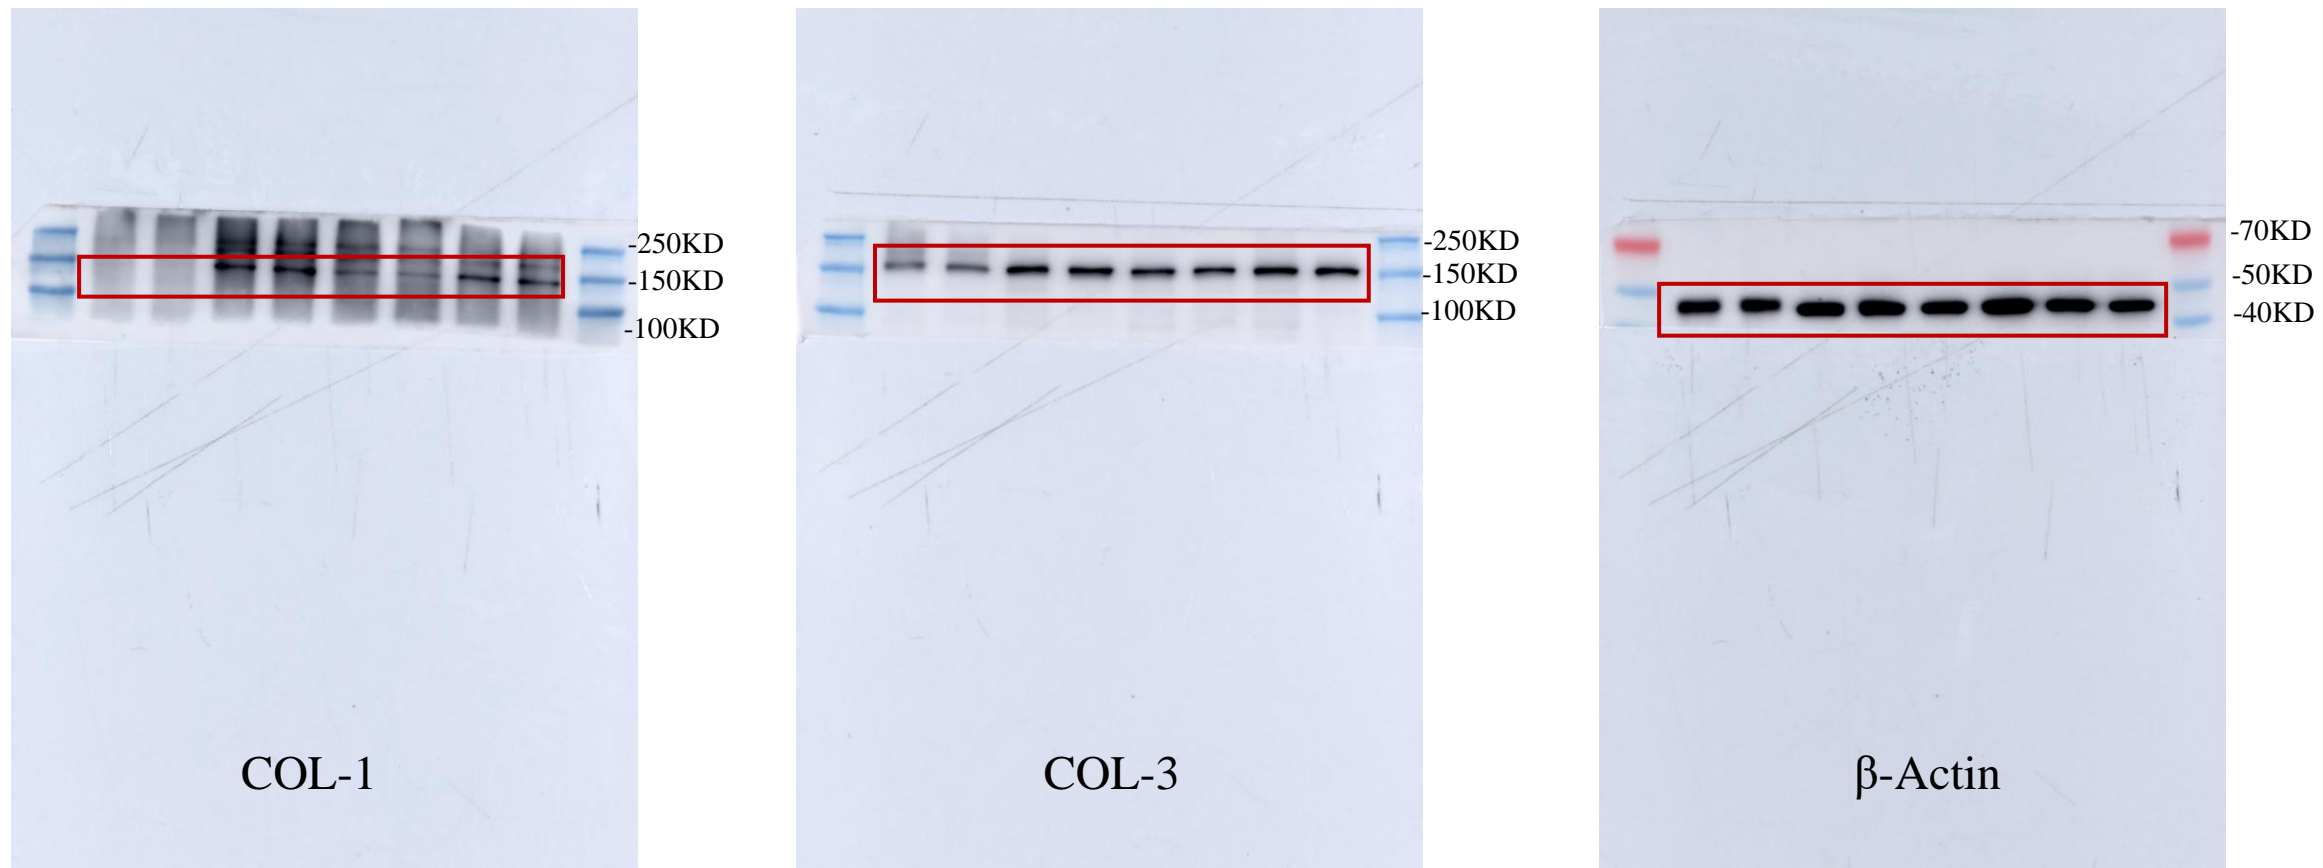

Figure 4 k

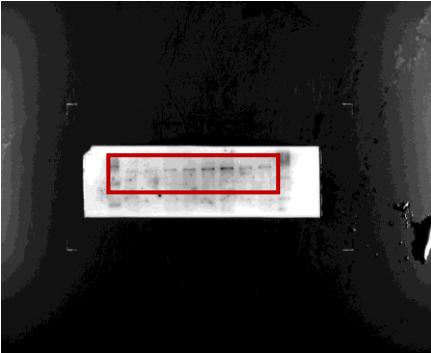

-250KD  
-150KD  
-100KD

COL-1

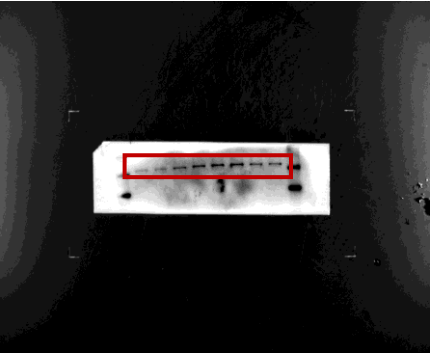

-250KD  
-150KD  
-100KD

COL-3

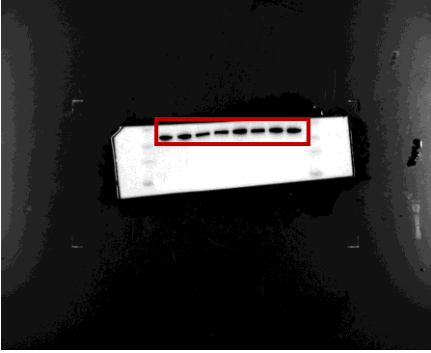

-70KD  
-50KD  
-40KD

$\beta$ -Actin

Figure 5 c

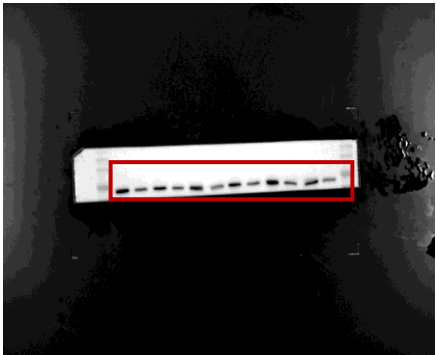

FTO

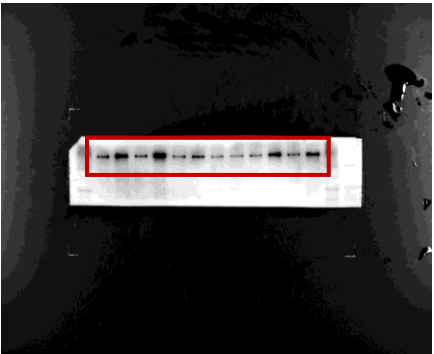

COL-1

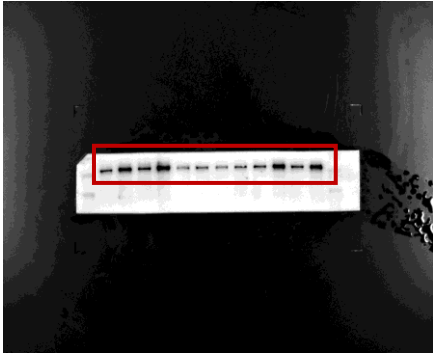

COL-3

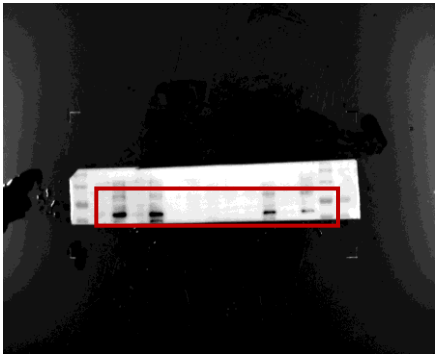

P-Smad2/3

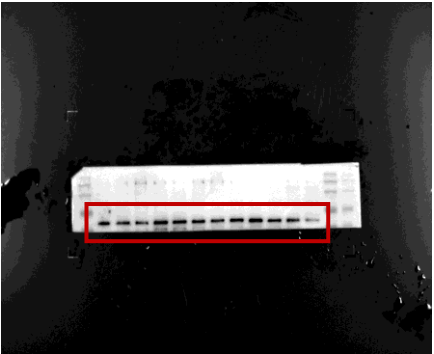

Smad2/3

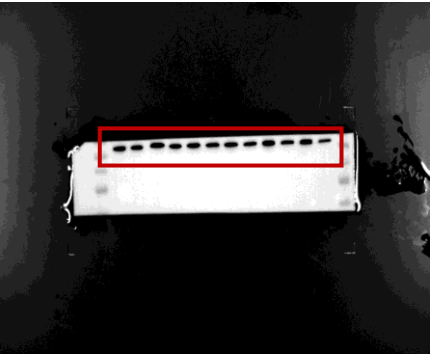

$\beta$ -Actin

Figure 5 i

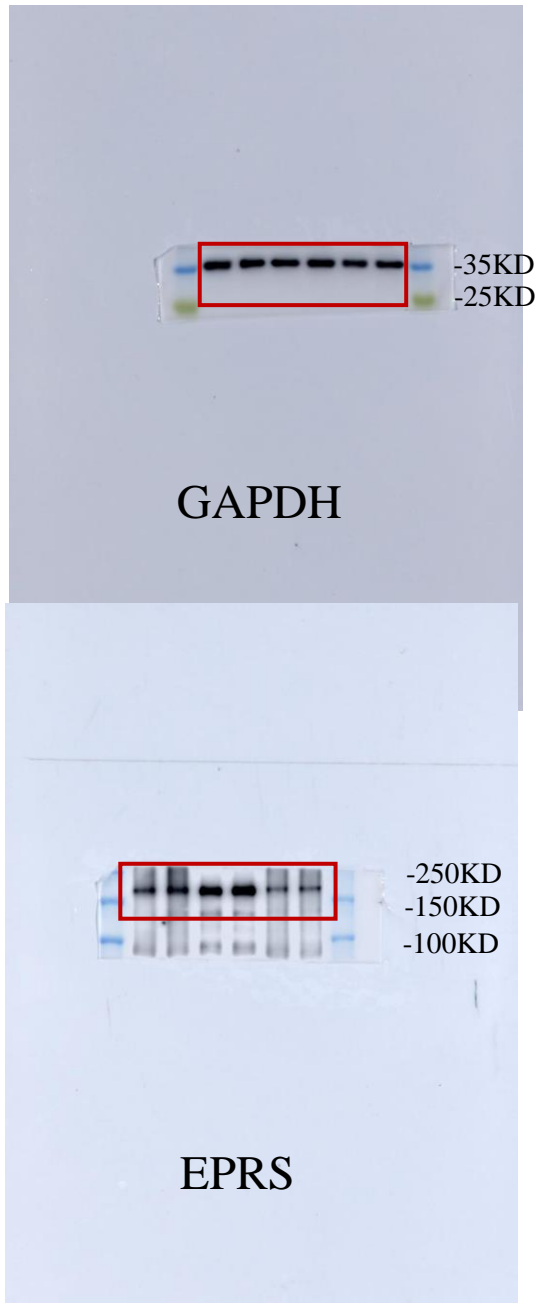

Figure 5 m

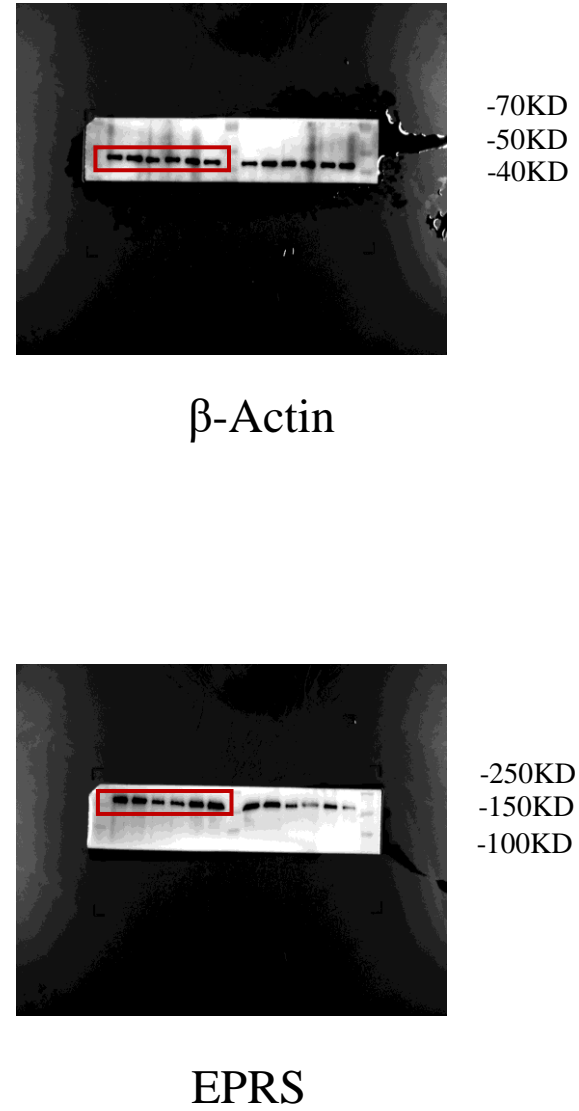

Figure 6 b

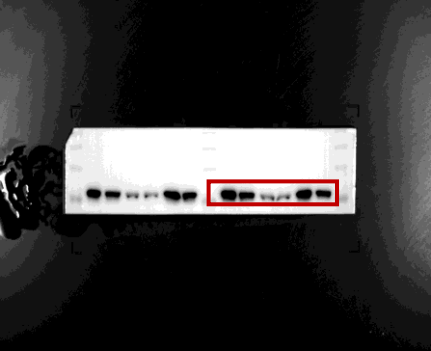

-250KD  
-150KD  
-100KD  
-70KD

IGF2BP3

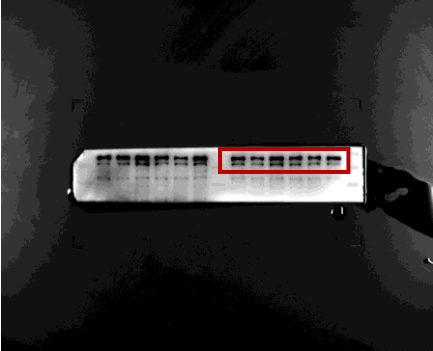

-250KD  
-150KD  
-100KD

COL-1

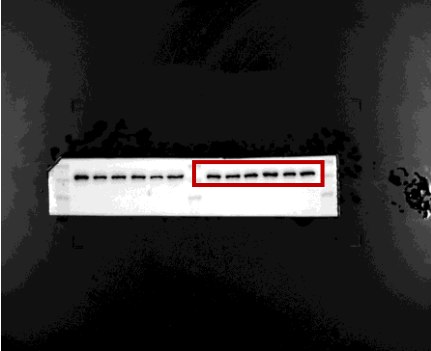

-250KD  
-150KD  
-100KD

COL-3

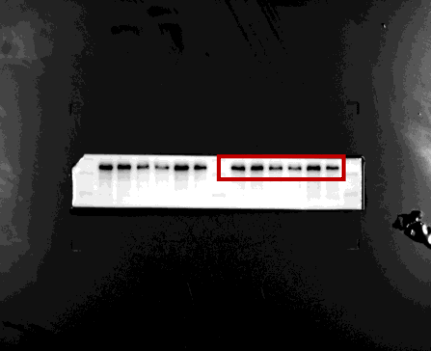

-250KD  
-150KD  
-100KD

EPRS

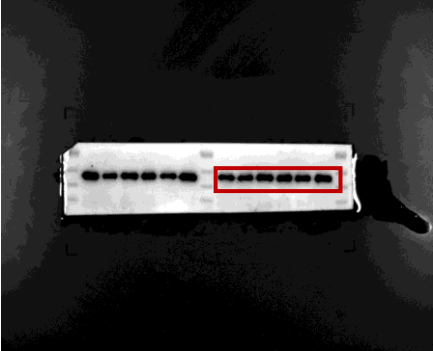

-70KD  
-50KD  
-40KD

$\beta$ -Actin

Figure 6 c

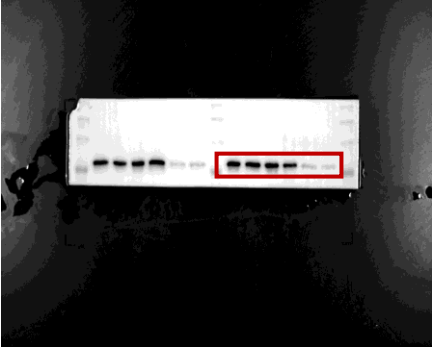

-250KD  
-150KD  
-100KD  
-70KD

IGF2BP3

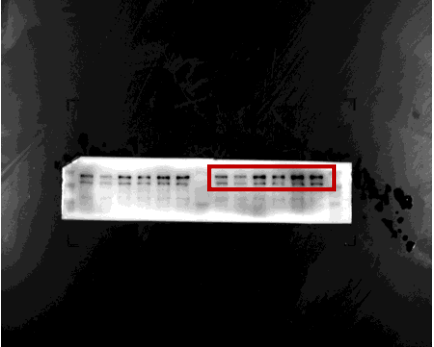

-250KD  
-150KD  
-100KD

COL-1

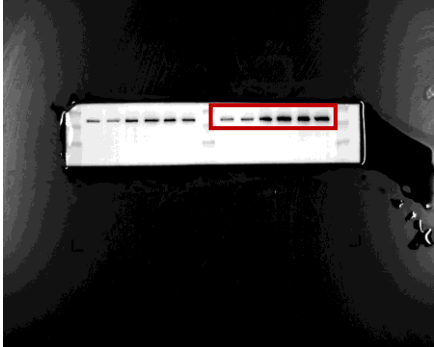

-250KD  
-150KD  
-100KD

COL-3

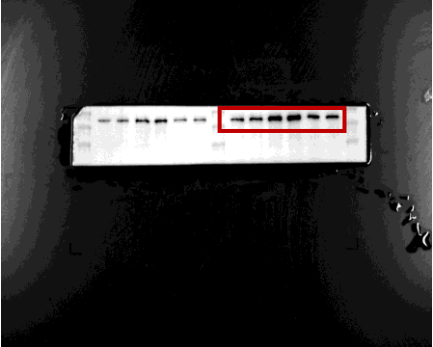

-250KD  
-150KD  
-100KD

EPRS

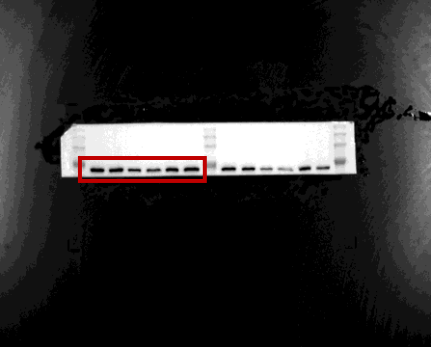

-250KD  
-150KD  
-100KD  
-70KD

FTO

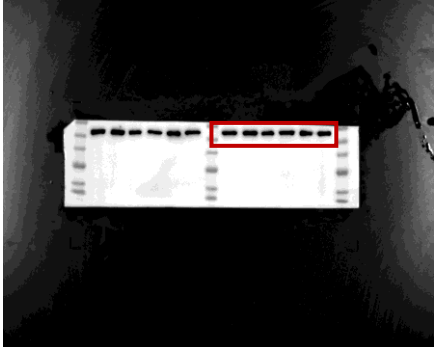

-50KD  
-40KD  
-35KD  
-20KD  
-15KD

$\beta$ -Actin



Figure 7 a

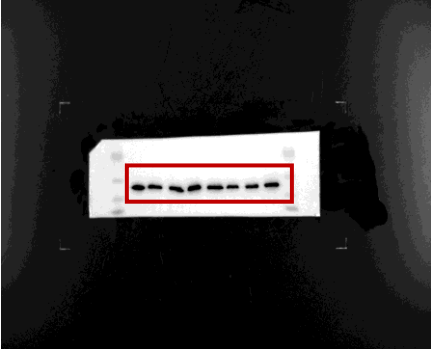

-70KD  
-50KD  
-40KD  
-35KD

$\beta$ -Actin

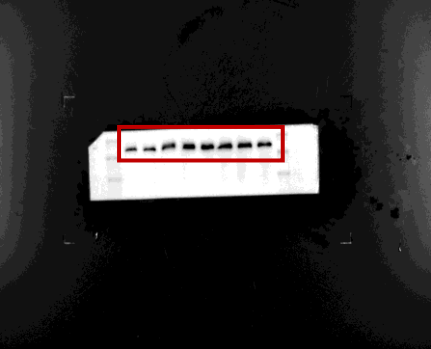

-250KD  
-150KD  
-100KD

EPRS

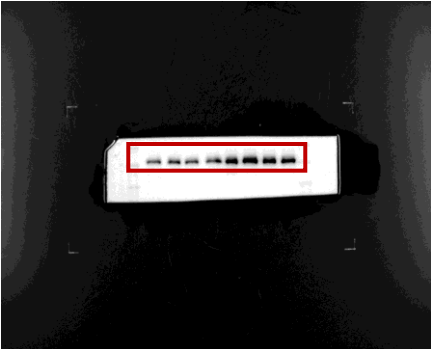

-250KD  
-150KD  
-100KD

EPRS

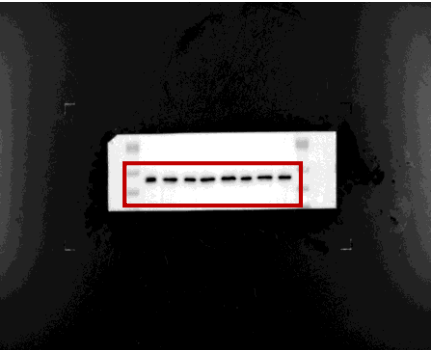

-70KD  
-50KD  
-40KD  
-35KD

$\beta$ -Actin

Figure 7 b

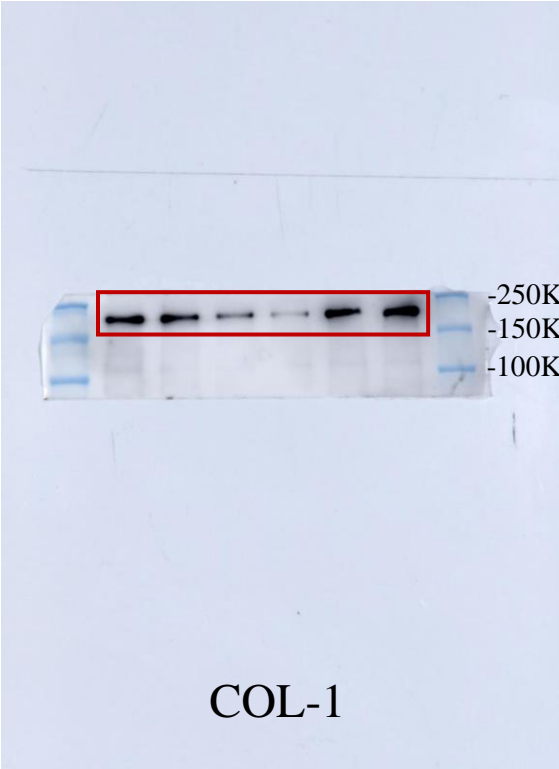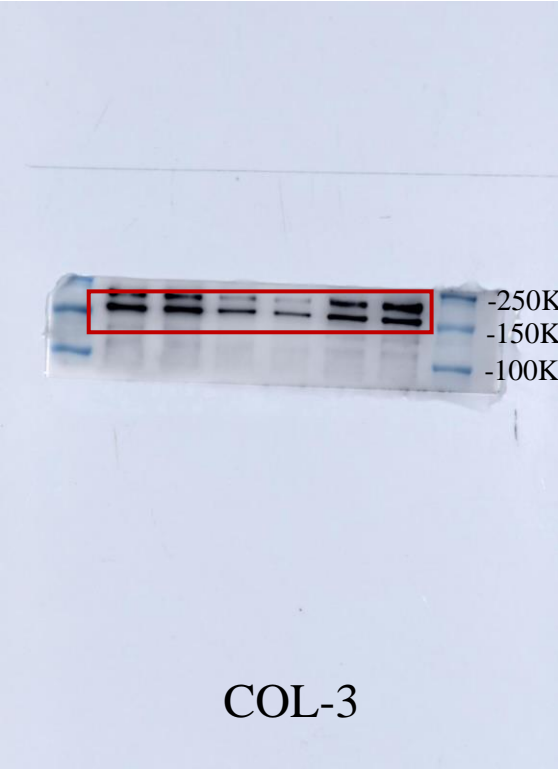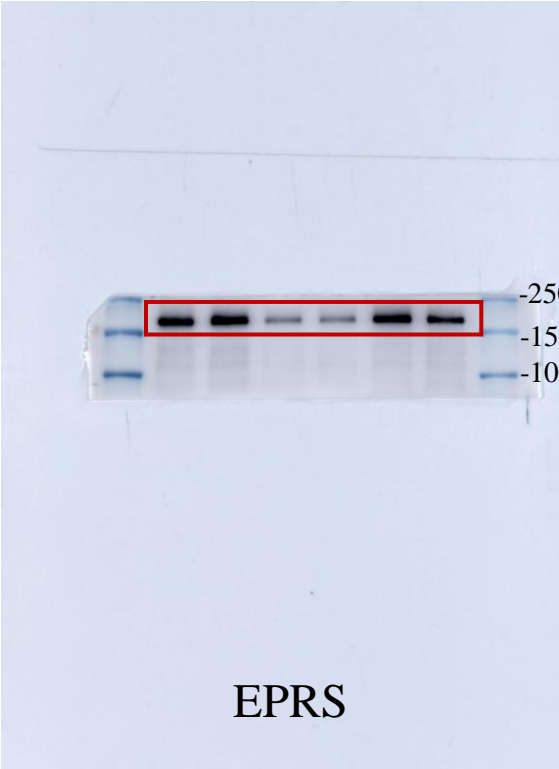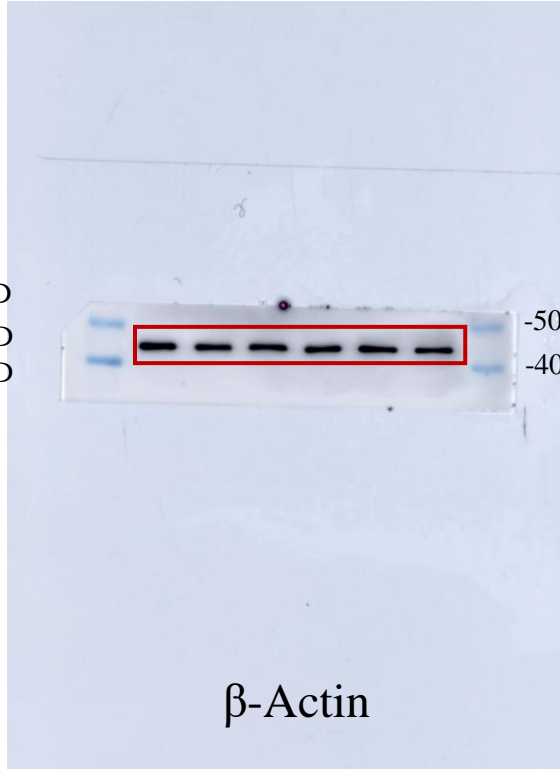

Figure 7 d

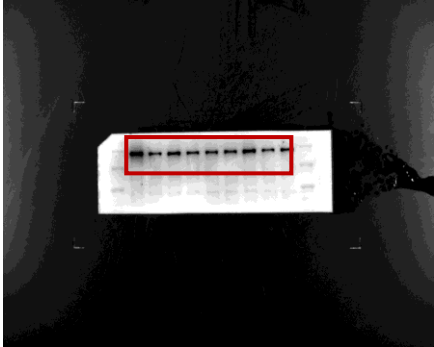

-250KD  
-150KD  
-100KD

COL-1

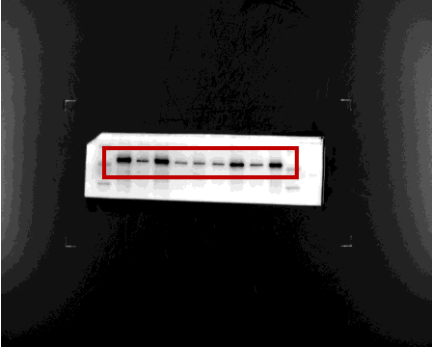

-250KD  
-150KD  
-100KD

COL-3

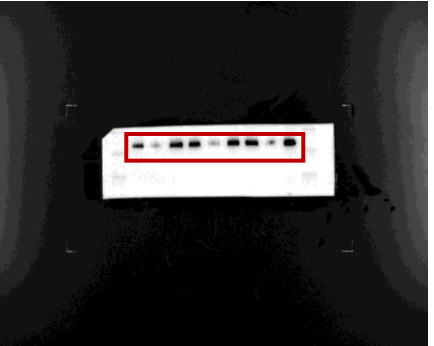

-250KD  
-150KD  
-100KD

EPRS

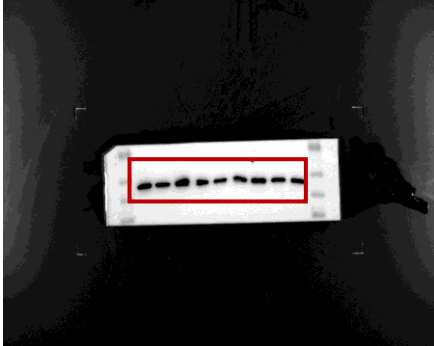

-70KD  
-50KD  
-40KD  
-35KD

$\beta$ -Actin

Figure 7 e

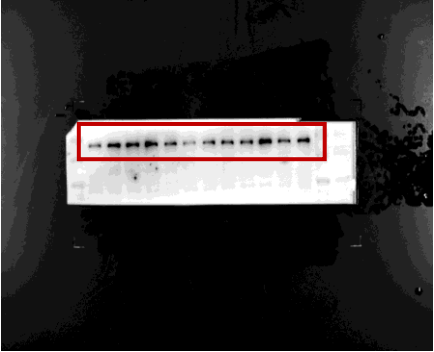

-250KD  
-150KD  
-100KD

COL-1

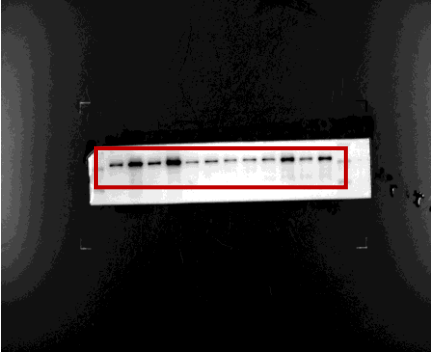

-250KD  
-150KD  
-100KD

COL-3

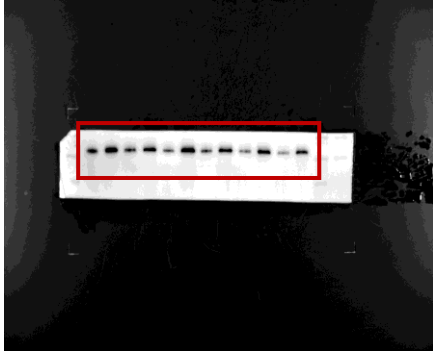

-250KD  
-150KD  
-100KD

EPRS

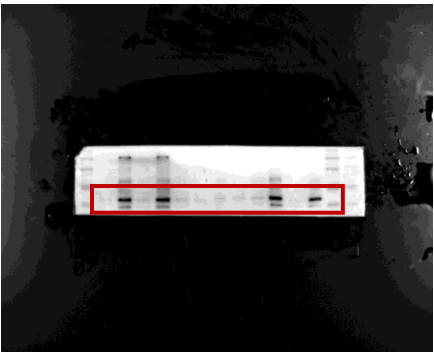

-100KD  
-70KD  
-50KD

P-Smad2/3

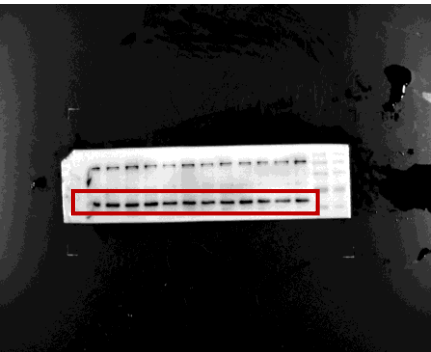

-100KD  
-70KD  
-50KD

Smad2/3

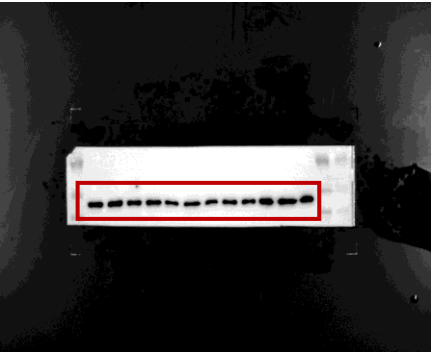

-70KD  
-50KD  
-40KD  
-35KD

$\beta$ -Actin

Figure 7 i

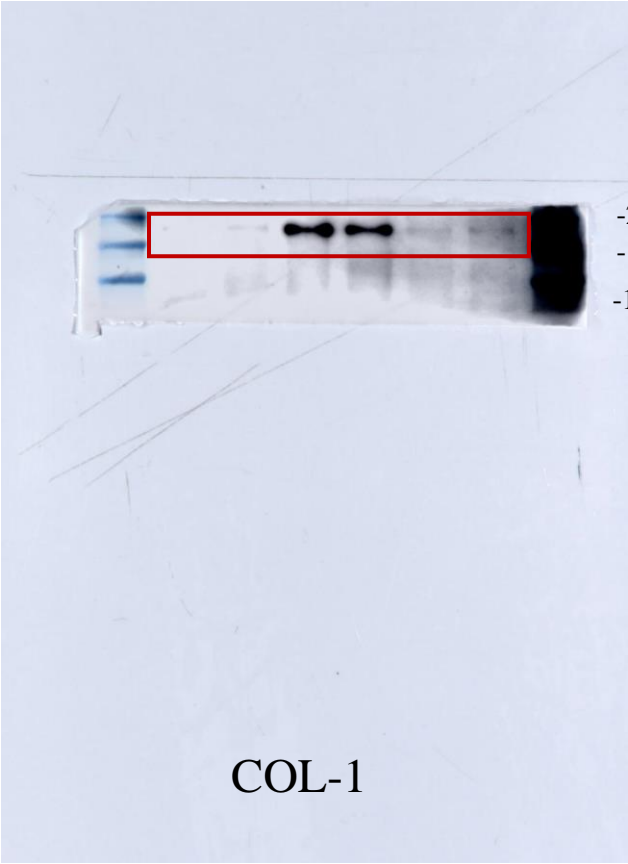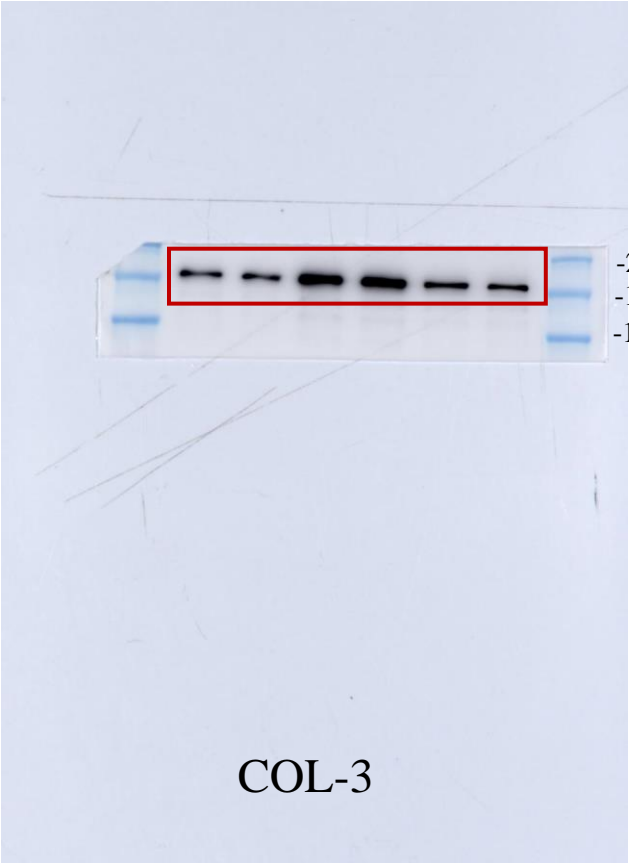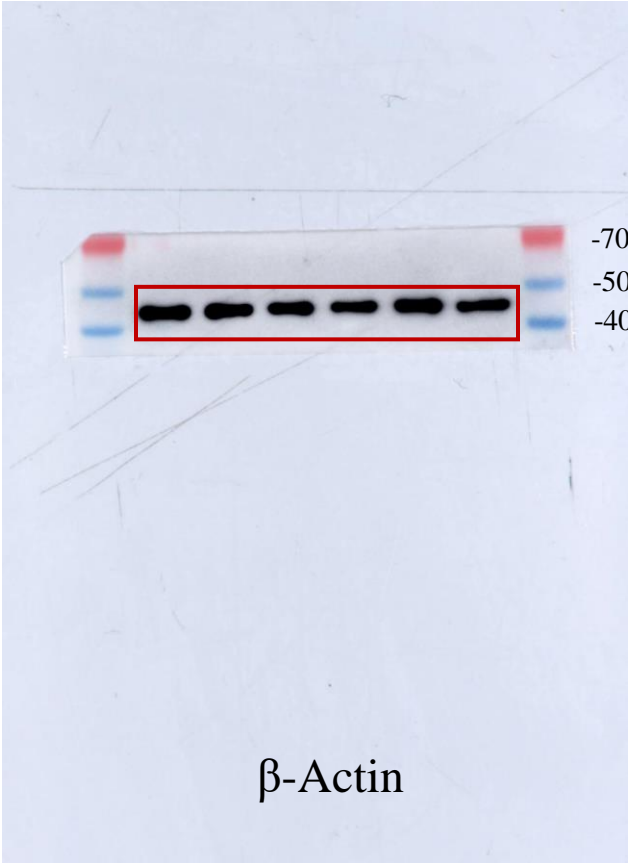

Figure 7 k

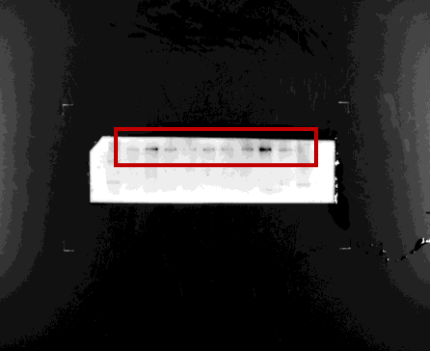

-250KD  
-150KD  
-100KD

COL-1

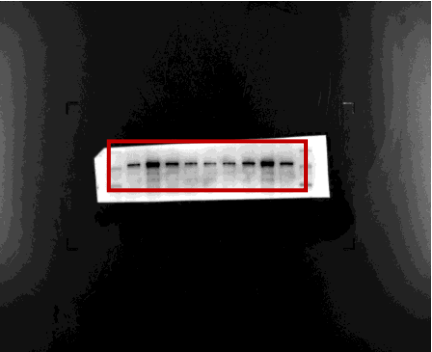

-250KD  
-150KD  
-100KD

COL-3

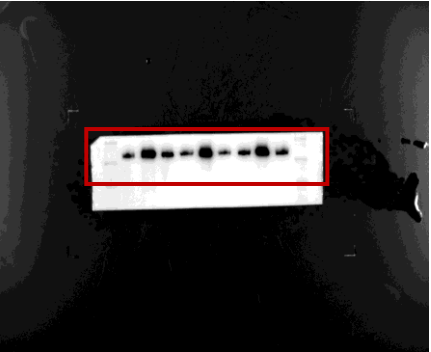

-250KD  
-150KD  
-100KD

EPRS

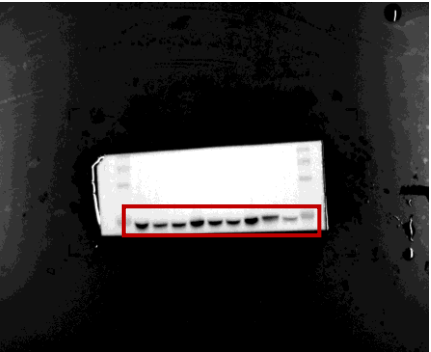

-250KD  
-150KD  
-100KD  
-70KD

FTO

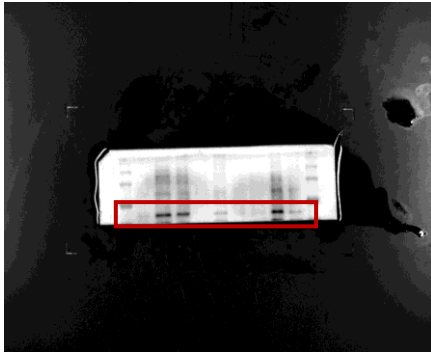

-100KD  
-70KD  
-50KD

P-Smad2/3

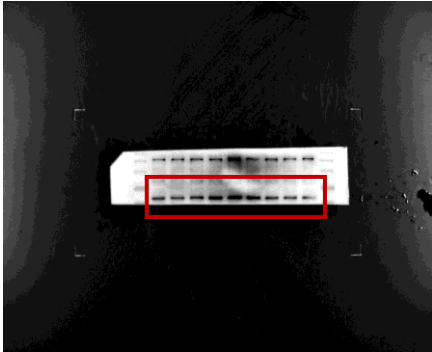

-100KD  
-70KD  
-50KD

Smad2/3

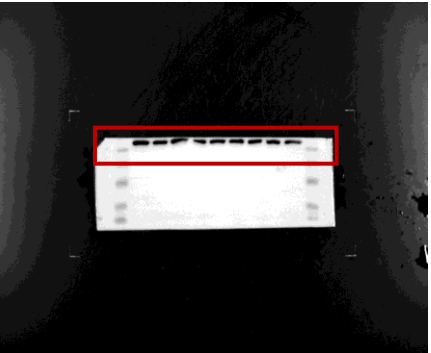

-50KD  
-40KD  
-35KD

$\beta$ -Actin
